# Supplementary material for: Adherence to Treatment Guidelines and Associated Survival in Older Patients with Prostate Cancer: A Prospective Multicentre Cohort Study
Source: MDPI journal article supplement (doi:10.3390/cancers13184694), 2021-09-18
Supplement: s1 [file s1]

**Table S3. Bivariate analysis for receiving guideline-discordant treatment, according to at least one of the three sets of guidelines.**

|                                                                           | Concordant<br>t (%) | Discordant<br>(%) | p-value<br>a | OR [95%CI]       | p-value b |
|---------------------------------------------------------------------------|---------------------|-------------------|--------------|------------------|-----------|
| N=356                                                                     | n= 192              | n= 164            |              |                  |           |
| Decrease in food intake (G8 score item)                                   |                     |                   |              |                  |           |
| No decrease                                                               | 115(63)             | 87(56)            | 0.5          | 1                |           |
| Moderate                                                                  | 44(24)              | 44(29)            |              | 1.32 [0.70-2.51] | 0.3       |
| Severe                                                                    | 23(13)              | 23(15)            |              | 1.32 [0.80-2.18] | 0.4       |
| Weight loss (G8 score item)                                               |                     |                   |              |                  |           |
| No weight loss                                                            | 92(51)              | 65(42)            | 0.3          | 1                |           |
| Does not know                                                             | 18(10)              | 12(8)             |              | 0.94 [0.43-2.09] | 0.9       |
| 1-3 kg                                                                    | 26(14)              | 23(15)            |              | 1.25 [0.66-2.39] | 0.5       |
| > 3 kg                                                                    | 46(25)              | 53(35)            |              | 1.63 [0.98-2.71] | 0.06      |
| Mobility (G8 score item)                                                  |                     |                   |              |                  |           |
| Goes out                                                                  | 118(65)             | 119(77)           | 0.03         | 1                |           |
| Able to get out of bed/chair<br>but does not go out                       | 40(22)              | 19(12)            |              | 0.47 [0.26-0.86] | 0.01      |
| Bed- or chair-bound                                                       | 24(13)              | 16(11)            |              | 0.66 [0.33-1.31] | 0.2       |
| Neuropsychological problem (G8 score item)                                |                     |                   |              |                  |           |
| No neuropsychological<br>problems                                         | 104(58)             | 102(67)           | 0.2          | 1                |           |
| Mild dementia                                                             | 62(34)              | 39(25)            |              | 0.64 [0.39-1.03] | 0.1       |
| Severe dementia or<br>depression                                          | 15(8)               | 12(8)             |              | 0.82 [0.36-1.83] | 0.6       |
| Body mass index (G8 score item)                                           |                     |                   |              |                  |           |
| < 19                                                                      | 13(7)               | 7(4)              | 0.7          | 0.60 [0.23-1.55] | 0.3       |
| 19-21                                                                     | 15(8)               | 15(9)             |              | 1.11 [0.52-2.37] | 0.8       |
| 21-23                                                                     | 30(16)              | 24(15)            |              | 0.89 [0.49-1.61] | 0.7       |
| >23                                                                       | 129(69)             | 116(72)           |              | 1                |           |
| More than three prescription drugs per day (G8 score item)                |                     |                   |              |                  |           |
| No                                                                        | 42(22)              | 38(23)            | 0.8          | 1                |           |
| Yes                                                                       | 150(78)             | 126(77)           |              | 0.93 [0.56-1.53] | 0.8       |
| Health status compared with other people of the same age (G8 score item)  |                     |                   |              |                  |           |
| Better                                                                    | 74(42)              | 57(37)            | 0.4          | 1                |           |
| Does not know/As good                                                     | 83(47)              | 71(47)            |              | 1.11 [0.69-1.77] | 0.7       |
| Not as good                                                               | 20(11)              | 25(16)            |              | 1.62 [0.82-3.21] | 0.2       |
| Age (G8 score item)                                                       |                     |                   |              |                  |           |
| <80                                                                       | 65(34)              | 78(48)            | 0.02         | 1                |           |
| 80-85                                                                     | 72(37)              | 55(33)            |              | 0.64 [0.39-1.03] | 0.1       |
| > 86                                                                      | 55(29)              | 31(19)            |              | 0.47 [0.27-0.81] | 0.01      |
| Activities of Daily Living score                                          |                     |                   |              |                  |           |
| Independent                                                               | 171 (89)            | 144 (88)          | 0.8          | 1                |           |
| ≥ 1 abnormal item                                                         | 21 (11)             | 19 (12)           |              | 1.07 [0.56-2.08] | 0.8       |
| Instrumental Activities of Daily Living score                             |                     |                   |              |                  |           |
| Independent                                                               | 110 (59)            | 95 (62)           | 0.7          | 1                |           |
| ≥ 1 abnormal item                                                         | 75 (41)             | 59 (38)           |              | 0.92 [0.59-1.43] | 0.7       |
| Cumulative Illness Rating Scale for Geriatrics grade 3 or 4 comorbidities |                     |                   |              |                  |           |
| No                                                                        | 52 (28)             | 45 (28)           | 1            | 1                |           |
| At least one                                                              | 131 (72)            | 114 (72)          |              | 1.01 [0.63-1.61] | 1         |
| Eastern Cooperative Oncology Group performance status                     |                     |                   |              |                  |           |
| 0-1                                                                       | 91 (48)             | 92(56)            | 0.3          | 1                |           |
| 2                                                                         | 52 (27)             | 37 (23)           |              | 0.70 [0.42-1.17] | 0.2       |
| 3-4                                                                       | 48 (25)             | 35 (21)           |              | 0.72 [0.43-1.22] | 0.2       |
| Risk of depression                                                        |                     |                   |              |                  |           |
| No                                                                        | 102 (58)            | 105 (67)          | 0.1          | 1                |           |
| Yes                                                                       | 75 (42)             | 52 (33)           |              | 0.67 [0.43-1.05] | 0.1       |

**Table S3. (Continued)**

| Cognitive impairment                        |              |              |        |                  |        |
|---------------------------------------------|--------------|--------------|--------|------------------|--------|
| No                                          | 124 (66)     | 122 (77)     | 0.02   | 1                |        |
| Yes                                         | 65 (34)      | 37 (23)      |        | 0.58 [0.36-0.93] | 0.02   |
| Gleason score                               |              |              |        |                  |        |
| ≤ 6                                         | 12 (10)      | 17 (14)      | 0.1    | 1                |        |
| 7                                           | 40 (32)      | 49 (42)      |        | 0.86 [0.37-2.02] | 0.7    |
| 8 à 10                                      | 73 (58)      | 51 (44)      |        | 0.49 [0.22-1.12] | 0.1    |
| Serum prostate-specific antigen (PSA) level |              |              |        |                  |        |
| Log PSA                                     | 3.8(2.8-4.9) | 3.2(2.3-4.8) | 0.1    | 1                |        |
|                                             |              |              |        | 0.9 [0.79-1.02]  | 0.1    |
| Clinical stage                              |              |              |        |                  |        |
| Non-metastatic                              | 41 (21)      | 80 (50)      | <0.001 | 1                |        |
| Metastatic                                  | 151 (79)     | 79 (50)      |        | 0.27 [0.17-0.43] | <0.001 |
| Marital status                              |              |              |        |                  |        |
| Married                                     | 132 (70)     | 124 (76)     | 0.2    | 1                |        |
| Other                                       | 57 (30)      | 40 (24)      |        | 0.75 [0.47-1.20] | 0.2    |
| Living alone                                |              |              |        |                  |        |
| No                                          | 149 (78)     | 130 (79.27)  | 0.8    | 1                |        |
| Yes                                         | 42 (22)      | 34 (20.73)   |        | 0.93 [0.56-1.54] | 0.8    |
| Smoking status                              |              |              |        |                  |        |
| Non-smoker                                  | 79 (47)      | 72 (50)      | 0.8    | 1                |        |
| Active smoker                               | 11 (6)       | 9 (6)        |        | 0.90 [0.35-2.29] | 0.8    |
| Ancient smoker                              | 79 (47)      | 63 (44)      |        | 0.88 [0.55-1.39] | 0.6    |

**OR: Odds Ratio.**

**a. Chi squared test for qualitative variables, t-test for quantitative variables.**

**b. Wald's test.**
