# Supplementary material for: Adherence to Treatment Guidelines and Associated Survival in Older Patients with Prostate Cancer: A Prospective Multicentre Cohort Study
Source: MDPI journal article supplement (doi:10.3390/cancers13184694), 2021-09-18
Supplement: s1 [file s1]

**Table S4. Bivariate analysis of associated factors with overall survival at 24 and 36 months.**

|                                                                                  | 24-month OS |                   |                | 36-month OS         |                   |                |
|----------------------------------------------------------------------------------|-------------|-------------------|----------------|---------------------|-------------------|----------------|
|                                                                                  | Log rank p  | HR [95%CI]        | p <sup>a</sup> | Log rank p          | HR [95%CI]        | p <sup>a</sup> |
| N= 275                                                                           |             |                   |                |                     |                   |                |
| <b>G8 score</b>                                                                  |             |                   |                |                     |                   |                |
| > 14                                                                             |             | 1                 |                |                     | 1                 |                |
| ≤14                                                                              | <0.001      | 6.78 [3.45-13.33] | <0.001         | <0.001              | 7.27 [3.82-13.83] | <0.001         |
| <b>Activities of Daily Living score</b>                                          |             |                   |                |                     |                   |                |
| Independent                                                                      |             | 1                 |                |                     | 1                 |                |
| ≥ 1 abnormal item                                                                | <0.001      | 4.48 [2.98-6.74]  | <0.001         | <0.001              | 4.66 [3.14-6.92]  | <0.001         |
| <b>Instrumental Activities of Daily Living score</b>                             |             |                   |                |                     |                   |                |
| Independent                                                                      |             | 1                 |                |                     | 1                 |                |
| ≥ 1 abnormal item                                                                | <0.001      | 3.30 [2.36-4.62]  | <0.001         | <0.001              | 3.27 [2.37-4.51]  | <0.001         |
| <b>Age</b>                                                                       |             |                   |                |                     |                   |                |
| <80                                                                              |             | 1                 |                |                     | 1                 |                |
| 81-90                                                                            |             | 1.33 [0.95-1.87]  | 0.09           |                     | 1.37 [0.99-1.89]  | 0.06           |
| >90                                                                              | <0.001      | 2.90 [1.69-4.98]  | <0.001         | <0.001              | 2.94 [1.72-5.04]  | <0.001         |
| <b>Cumulative Illness Rating Scale for Geriatrics grade 3 or 4 comorbidities</b> |             |                   |                |                     |                   |                |
| No                                                                               |             | 1                 |                |                     | 1                 |                |
| At least one                                                                     | <0.001      | 2.38 [1.58-3.58]  | <0.001         | <0.001              | 2.62 [1.75-3.90]  | <0.001         |
| <b>Eastern Cooperative Oncology Group performance status</b>                     |             |                   |                |                     |                   |                |
| 0 & 1                                                                            |             | 1                 |                |                     | 1                 |                |
| 2                                                                                |             | 3.29 [2.19-4.96]  | <0.001         |                     | 3.41 [2.31-5.01]  | <0.001         |
| 3&4                                                                              | <0.001      | 6.69 [4.52-9.91]  | <0.001         | <0.001              | 6.54 [4.48-9.55]  | <0.001         |
| <b>Risk of depression</b>                                                        |             |                   |                |                     |                   |                |
| No                                                                               |             | 1                 |                |                     | 1                 |                |
| Yes                                                                              | <0.001      | 1.95 [1.40-2.70]  | <0.001         | <0.001              | 1.94 [1.41-2.67]  | <0.001         |
| <b>Cognitive impairment</b>                                                      |             |                   |                |                     |                   |                |
| No                                                                               |             | 1                 |                |                     | 1                 |                |
| Yes                                                                              | <0.001      | 2.09 [1.50-2.92]  | <0.001         | <0.001              | 2.13 [1.55-2.93]  | <0.001         |
| <b>Weight loss</b>                                                               |             |                   |                |                     |                   |                |
| <5%                                                                              |             | 1                 |                |                     | 1                 |                |
| 5-10%                                                                            |             | 1.51 [0.98-2.32]  | 0.06           |                     | 1.60 [1.05-2.42]  | 0.03           |
| >10%                                                                             | <0.001      | 2.73 [1.86-3.99]  | <0.001         | <0.001              | 3.03 [2.10-4.34]  | <0.001         |
| <b>Gleason Score</b>                                                             |             |                   |                |                     |                   |                |
| ≤ 6                                                                              |             | 1                 |                |                     | 1                 |                |
| 7                                                                                |             | 1.52 [0.63-3.70]  | 0.3            |                     | 1.24 [0.56-2.71]  | 0.6            |
| 8 to 10                                                                          | <0.001      | 3.24 [1.39-7.52]  | 0.01           | <0.001              | 2.70 [1.29-5.66]  | 0.01           |
| <b>Serum prostate-specific antigen (PSA) level</b>                               |             |                   |                |                     |                   |                |
| Log PSA                                                                          | <0.001*     | 1.34 [1.20-1.48]  | <0.001         | <0.001 <sup>b</sup> | 1.32 [1.19-1.46]  | <0.001         |
| <b>Clinical stage</b>                                                            |             |                   |                |                     |                   |                |
| Non-metastatic                                                                   |             | 1                 |                |                     | 1                 |                |
| Metastatic                                                                       | <0.001      | 4.81 [3.14-7.36]  | <0.001         | <0.001              | 4.88 [3.27-7.30]  | <0.001         |
| <b>Smoking status</b>                                                            |             |                   |                |                     |                   |                |
| Non-smoker                                                                       |             | 1                 |                |                     | 1                 |                |
| Active smoker                                                                    |             | 1.03 [0.49-2.14]  | >0.9           |                     | 0.93 [0.45-1.93]  | 0.8            |
| Ancient smoker                                                                   | 0.6         | 1.19 [0.84-1.68]  | 0.3            | 0.6                 | 1.17 [0.84-1.63]  | 0.4            |

**Table S4. (Continued)**

|                                                   |     |                  |     |     |                  |     |
|---------------------------------------------------|-----|------------------|-----|-----|------------------|-----|
| <b>Treatment according to all 3 guidelines</b>    |     |                  |     |     |                  |     |
| Concordant                                        |     | 1                |     |     | 1                |     |
| Discordant                                        | 0.8 | 0.97 [0.71-1.34] | 0.8 | 0.8 | 0.96 [0.70-1.30] | 0.8 |
| <b>Treatment according to the SIOG guidelines</b> |     |                  |     |     |                  |     |
| Concordant                                        |     | 1                |     |     | 1                |     |
| Discordant                                        | 0.8 | 1.06 [0.73-1.54] | 0.8 | 0.8 | 0.95 [0.66-1.38] | 0.8 |
| <b>Treatment according to the EAU guidelines</b>  |     |                  |     |     |                  |     |
| Concordant                                        |     | 1                |     |     | 1                |     |
| Discordant                                        | 0.9 | 0.99 [0.66-1.48] | 0.9 | 0.9 | 0.96 [0.66-1.42] | 0.9 |
| <b>Treatment according to the AFU guidelines</b>  |     |                  |     |     |                  |     |
| Concordant                                        |     | 1                |     |     | 1                |     |
| Discordant                                        | 0.8 | 1.00 [0.72-1.39] | 1   | 0.8 | 0.96 [0.70-1.32] | 0.8 |

HR: hazard ratio.

a. Wald's test.

b. p-value corresponds to the Cox regression model.
