# Supplementary material for: Adherence to Treatment Guidelines and Associated Survival in Older Patients with Prostate Cancer: A Prospective Multicentre Cohort Study
Source: MDPI journal article supplement (doi:10.3390/cancers13184694), 2021-09-18
Supplement: s1 [file s1]

**Table S2. Demographic characteristics of participants. N=402.**

| <b>Variable</b>                                                                 | <b>N (%)</b> |
|---------------------------------------------------------------------------------|--------------|
| <b>Decrease in food intake (G8 score item)</b>                                  |              |
| No decrease                                                                     | 233(58)      |
| Moderate                                                                        | 94(23)       |
| Severe                                                                          | 47(12)       |
| Missing                                                                         | 28(7)        |
| <b>Weight loss (G8 score item)</b>                                              |              |
| No weight loss                                                                  | 184(46)      |
| Not known                                                                       | 32(8)        |
| 1-3 kg                                                                          | 56(14)       |
| > 3 kg                                                                          | 101(25)      |
| Missing                                                                         | 29(7)        |
| <b>Mobility (G8 score item)</b>                                                 |              |
| Goes out                                                                        | 265(66)      |
| Able to get out of bed/chair but does not go out                                | 66(16)       |
| Bed- or chair-bound                                                             | 43 (11)      |
| Missing                                                                         | 28(7)        |
| <b>Neuropsychological problem (G8 score item)</b>                               |              |
| No neuropsychological problem                                                   | 231(57)      |
| Mild dementia                                                                   | 110(27)      |
| Severe dementia or depression                                                   | 31(8)        |
| Missing                                                                         | 30(7)        |
| <b>Body mass index (G8 score item)</b>                                          |              |
| < 19                                                                            | 22(5)        |
| 19-21                                                                           | 32(8)        |
| 21-23                                                                           | 60(15)       |
| >23                                                                             | 277(69)      |
| Missing                                                                         | 11(3)        |
| <b>More than three prescription drugs per day (G8 score item)</b>               |              |
| No                                                                              | 89(22)       |
| Yes                                                                             | 313(78)      |
| <b>Health status compared with other people of the same age (G8 score item)</b> |              |
| Better                                                                          | 149(37)      |
| Does not know/As good                                                           | 173(43)      |
| Not as good                                                                     | 45(11)       |
| Missing                                                                         | 35(9)        |
| <b>Age (G8 score item)</b>                                                      |              |
| <80                                                                             | 162(40)      |
| 80-85                                                                           | 143(36)      |
| > 86                                                                            | 97(24)       |
| <b>G8 score</b>                                                                 |              |
| > 14                                                                            | 89(22)       |
| ≤14                                                                             | 303(75)      |
| Missing                                                                         | 10(3)        |
| <b>Activities of Daily Living score</b>                                         |              |
| Independent                                                                     | 360 (89.5)   |
| ≥ 1 abnormal item                                                               | 40(10)       |
| Missing                                                                         | 2(0.5)       |
| <b>Instrumental Activities of Daily Living score</b>                            |              |
| Independent                                                                     | 227 (56)     |
| ≥ 1 abnormal item                                                               | 147 (37)     |
| Missing                                                                         | 28(7)        |

**Table S2. (Continued)**

| <b>Cumulative Illness Rating Scale for Geriatrics grade 3 or 4 comorbidities</b> |           |
|----------------------------------------------------------------------------------|-----------|
| No                                                                               | 116(29)   |
| Yes                                                                              | 258(64)   |
| Missing                                                                          | 28(7)     |
| <b>Eastern Cooperative Oncology Group performance status</b>                     |           |
| 0-1                                                                              | 213 (53)  |
| 2                                                                                | 98 (24.4) |
| 3-4                                                                              | 90(22.4)  |
| Missing                                                                          | 1(0.2)    |
| <b>Risk of depression</b>                                                        |           |
| No                                                                               | 237 (59)  |
| Yes                                                                              | 135 (34)  |
| Missing                                                                          | 30(7)     |
| <b>Cognitive impairment</b>                                                      |           |
| No                                                                               | 279 (69)  |
| Yes                                                                              | 115 (29)  |
| Missing                                                                          | 8 (2)     |
| <b>Health status <sup>b</sup></b>                                                |           |
| Fit                                                                              | 54(13)    |
| Vulnerable                                                                       | 81(20)    |
| Frail                                                                            | 230(57)   |
| Terminally ill                                                                   | 30(8)     |
| Missing                                                                          | 7(2)      |
| <b>Gleason score</b>                                                             |           |
| ≤ 6                                                                              | 36 (9)    |
| 7                                                                                | 105 (26)  |
| 8-10                                                                             | 140(35)   |
| Missing                                                                          | 121(30)   |
| <b>Serum prostate-specific antigen (ng/ml, median (IQR))</b>                     |           |
| 30(10.3-122)                                                                     | 325(81)   |
| Missing                                                                          | 77(19)    |
| <b>Clinical stage</b>                                                            |           |
| Non-metastatic                                                                   | 142 (35)  |
| Metastatic                                                                       | 252 (63)  |
| Missing                                                                          | 8(2)      |
| <b>Nodal involvement</b>                                                         |           |
| No                                                                               | 190 (47)  |
| Yes                                                                              | 116 (29)  |
| Missing data                                                                     | 96(24)    |
| <b>D'Amico risk group (if M0, N0 or NX)</b>                                      |           |
| Low                                                                              | 6 (5)     |
| Intermediate                                                                     | 10(9)     |
| High                                                                             | 69 (59)   |
| Missing                                                                          | 32(27)    |
| <b>Treatments <sup>a</sup></b>                                                   |           |
| Radical prostatectomy                                                            | 17 (4)    |
| Radiotherapy                                                                     | 76 (19)   |
| Androgen deprivation therapy                                                     | 212 (53)  |
| Chemotherapy                                                                     | 97 (24)   |
| Supportive care                                                                  | 42 (10)   |

**Table S2. (Continued)**

|                       |            |
|-----------------------|------------|
| <b>Living alone</b>   |            |
| No                    | 308 (76.7) |
| Yes                   | 93(23.1)   |
| Missing               | 1(0.2)     |
| <b>Marital status</b> |            |
| Married               | 281(70)    |
| Other                 | 118(29)    |
| Missing               | 3(1)       |
| <b>Smoking status</b> |            |
| Never smoker          | 169 (42)   |
| Current smoker        | 22 (5.5)   |
| Former smoker         | 157 (39)   |
| Missing               | 54(13.5)   |

a. The sum of the percentages may not be 100 because some patients received more than one treatment.

b. Fit patients correspond to SIOG 2010 "healthy", SIOG 2014 & SIOG 2017 "fit" patients or Balducci "group 1" patients. Vulnerable patients correspond to SIOG 2010 & SIOG 2014 "vulnerable" patients, SIOG 2017 "frail" patients or Balducci "group 2" patients. Frail patients correspond to SIOG 2010 & SIOG 2014 "frail" patients, SIOG 2017 "disabled" patients or Balducci "group 3" patients. Terminal patients correspond to SIOG 2010 & SIOG 2017 "terminal" patients. SIOG: International Society of Geriatric Oncology.
